# Supplementary material for: An Efficient Method for Aneurysm Volume Quantification Applicable in Any Shape and Modalities
Source: PubMed Central journal article supplement — J Korean Neurosurg Soc. 2021 Jun 29;64(4):514–23. doi: 10.3340/jkns.2020.0255 (PMC8273770; doi:10.3340/jkns.2020.0255), 2021-06-29
Supplement: jkns-2020-0255-suppl1.pdf [file jkns-2020-0255-suppl1.pdf]

**Supplementary Data 1.** Use of aneurysm volume quantification methods in journals

| No. | Study                                   | Journal                     | Method           |
|-----|-----------------------------------------|-----------------------------|------------------|
| 1   | Reul et al. <sup>80)</sup> (1997)       | Neurosurgery                | 2-D assessment   |
| 2   | Murayama et al. <sup>67)</sup> (2006)   | J Neurosurg                 | 2-D assessment   |
| 3   | Guo et al. <sup>30)</sup> (2011)        | Eur J Radiol                | 2-D assessment   |
| 4   | Lawson et al. <sup>52)</sup> (2011)     | Neurosurgery                | 2-D assessment   |
| 5   | Zhao et al. <sup>120)</sup> (2013)      | J Clin Neurosci             | 2-D assessment   |
| 6   | Zhang et al. <sup>117)</sup> (2015)     | Exp Ther Med                | 2-D assessment   |
| 7   | Dabus et al. <sup>17)</sup> (2017)      | J Neurointerv Surg          | 2-D assessment   |
| 8   | Nakazaki et al. <sup>69)</sup> (2017)   | Acta Neurochir (Wien)       | 2-D assessment   |
| 9   | Gross et al. <sup>29)</sup> (2019)      | J Neurointerv Surg          | 2-D assessment   |
| 10  | Imamura et al. <sup>35)</sup> (2019)    | World Neurosurg             | 2-D assessment   |
| 11  | Sokolowski et al. <sup>96)</sup> (2019) | J Clin Neurosci             | 2-D assessment   |
| 12  | Satoh et al. <sup>86)</sup> (1997)      | Interv Neuroradiol          | Ellipsoid method |
| 13  | Satoh et al. <sup>87)</sup> (1998)      | Interv Neuroradiol          | Ellipsoid method |
| 14  | Kawanabe et al. <sup>42)</sup> (2001)   | Acta Neurochir (Wien)       | Ellipsoid method |
| 15  | Tamatani et al. <sup>104)</sup> (2002)  | AJNR Am J Neuroradiol       | Ellipsoid method |
| 16  | Cloft and Kallmes <sup>14)</sup> (2004) | AJNR Am J Neuroradiol       | Ellipsoid method |
| 17  | Sellar et al. <sup>88)</sup> (2004)     | J Neuroradiol               | Ellipsoid method |
| 18  | Goddard et al. <sup>27)</sup> (2005)    | AJNR Am J Neuroradiol       | Ellipsoid method |
| 19  | Kai et al. <sup>41)</sup> (2005)        | Neurosurgery                | Ellipsoid method |
| 20  | Vallée et al. <sup>110)</sup> (2005)    | Neuroradiology              | Ellipsoid method |
| 21  | Yagi et al. <sup>114)</sup> (2005)      | Neurol Med Chir (Tokyo)     | Ellipsoid method |
| 22  | Gaba et al. <sup>25)</sup> (2006)       | Stroke                      | Ellipsoid method |
| 23  | Ross and Dhillon <sup>81)</sup> (2006)  | Surg Neurol                 | Ellipsoid method |
| 24  | Yamazaki et al. <sup>115)</sup> (2006)  | Neurol Med Chir (Tokyo)     | Ellipsoid method |
| 25  | Hirsch et al. <sup>33)</sup> (2007)     | J Vasc Interv Radiol        | Ellipsoid method |
| 26  | Wakhloo et al. <sup>111)</sup> (2007)   | AJNR Am J Neuroradiol       | Ellipsoid method |
| 27  | Ding et al. <sup>21)</sup> (2008)       | AJNR Am J Neuroradiol       | Ellipsoid method |
| 28  | D'Agostino et al. <sup>18)</sup> (2009) | Surg Neurol                 | Ellipsoid method |
| 29  | Izar et al. <sup>38)</sup> (2011)       | PLoS One                    | Ellipsoid method |
| 30  | Smith et al. <sup>95)</sup> (2011)      | Neurosurgery                | Ellipsoid method |
| 31  | Tsutsumi et al. <sup>108)</sup> (2011)  | Neurosurgery                | Ellipsoid method |
| 32  | Kim et al. <sup>44)</sup> (2012)        | Neurointervention           | Ellipsoid method |
| 33  | Taussky et al. <sup>106)</sup> (2012)   | AJNR Am J Neuroradiol       | Ellipsoid method |
| 34  | Chun et al. <sup>12)</sup> (2013)       | Clin Neurol Neurosurg       | Ellipsoid method |
| 35  | Dai et al. <sup>19)</sup> (2013)        | J Neurointerv Surg          | Ellipsoid method |
| 36  | Harada and Moriok <sup>31)</sup> (2013) | J Neurointerv Surg          | Ellipsoid method |
| 37  | Khatri et al. <sup>43)</sup> (2013)     | Neurosurgery                | Ellipsoid method |
| 38  | Lee et al. <sup>55)</sup> (2013)        | J Korean Neurosurg Soc      | Ellipsoid method |
| 39  | Speirs et al. <sup>98)</sup> (2013)     | J Neurointerv Surg          | Ellipsoid method |
| 40  | Jiang et al. <sup>39)</sup> (2014)      | Cardiovasc Intervent Radiol | Ellipsoid method |
| 41  | Lee et al. <sup>56)</sup> (2014)        | Acta Neurochir (Wien)       | Ellipsoid method |

Supplementary Data 1. Continued

| No. | Study                                     | Journal               | Method                 |
|-----|-------------------------------------------|-----------------------|------------------------|
| 42  | Serafin et al. <sup>89)</sup> (2014)      | Pol J Radiol          | Ellipsoid method       |
| 43  | Cho et al. <sup>10)</sup> (2015)          | Neuroradiology        | Ellipsoid method       |
| 44  | Haworth et al. <sup>32)</sup> (2015)      | J Neurointerv Surg    | Ellipsoid method       |
| 45  | Zhang et al. <sup>119)</sup> (2015)       | Turk Neurosurg        | Ellipsoid method       |
| 46  | Ghostine et al. <sup>26)</sup> (2016)     | Interv Neuroradiol    | Ellipsoid method       |
| 47  | Ishida et al. <sup>36)</sup> (2016)       | J Neurosurg           | Ellipsoid method       |
| 48  | Ren et al. <sup>79)</sup> (2016)          | Interv Neuroradiol    | Ellipsoid method       |
| 49  | Taschner et al. <sup>105)</sup> (2016)    | Neuroradiology        | Ellipsoid method       |
| 50  | Wei et al. <sup>113)</sup> (2016)         | Interv Neuroradiol    | Ellipsoid method       |
| 51  | Yin et al. <sup>116)</sup> (2016)         | Interv Neuroradiol    | Ellipsoid method       |
| 52  | Cloutier et al. <sup>15)</sup> (2017)     | Interv Neuroradiol    | Ellipsoid method       |
| 53  | Lang et al. <sup>50)</sup> (2017)         | Clin Neuroradiol      | Ellipsoid method       |
| 54  | Ohshima et al. <sup>71)</sup> (2017)      | Nagoya J Med Sci      | Ellipsoid method       |
| 55  | Abi-Aad et al. <sup>1)</sup> (2018)       | Neuroradiology        | Ellipsoid method       |
| 56  | Kim et al. <sup>45)</sup> (2018)          | Clin Neurol Neurosurg | Ellipsoid method       |
| 57  | Lee et al. <sup>54)</sup> (2018)          | Neuroradiology        | Ellipsoid method       |
| 58  | Matsushige et al. <sup>63)</sup> (2018)   | Interv Neuroradiol    | Ellipsoid method       |
| 59  | Neki et al. <sup>70)</sup> (2018)         | J Neurointerv Surg    | Ellipsoid method       |
| 60  | Sousa et al. <sup>97)</sup> (2019)        | Clin Neuroradiol      | Ellipsoid method       |
| 61  | Suri et al. <sup>102)</sup> (2008)        | J Vasc Interv Neurol  | AngioCalc & AngioSuite |
| 62  | Simon et al. <sup>90)</sup> (2010)        | J Neurointerv Surg    | AngioCalc & AngioSuite |
| 63  | Colby et al. <sup>16)</sup> (2012)        | J Neurointerv Surg    | AngioCalc & AngioSuite |
| 64  | Chalouhi et al. <sup>9)</sup> (2013)      | Clin Neurol Neurosurg | AngioCalc & AngioSuite |
| 65  | Mascitelli et al. <sup>62)</sup> (2013)   | J Neurointerv Surg    | AngioCalc & AngioSuite |
| 66  | Singla et al. <sup>91)</sup> (2013)       | Acta Neurochir (Wien) | AngioCalc & AngioSuite |
| 67  | Milburn et al. <sup>64)</sup> (2014)      | J Neurointerv Surg    | AngioCalc & AngioSuite |
| 68  | Osanaï et al. <sup>72)</sup> (2014)       | Interv Neuroradiol    | AngioCalc & AngioSuite |
| 69  | Mascitelli et al. <sup>60)</sup> (2015)   | J Clin Neurosci       | AngioCalc & AngioSuite |
| 70  | Mascitelli et al. <sup>61)</sup> (2015)   | J Neurointerv Surg    | AngioCalc & AngioSuite |
| 71  | Berge et al. <sup>7)</sup> (2016)         | J Neuroradiol         | AngioCalc & AngioSuite |
| 72  | Griessenauer et al. <sup>28)</sup> (2016) | World Neurosurg       | AngioCalc & AngioSuite |
| 73  | Kaesmacher et al. <sup>40)</sup> (2016)   | J Neurointerv Surg    | AngioCalc & AngioSuite |
| 74  | Wang et al. <sup>112)</sup> (2016)        | J Neurointerv Surg    | AngioCalc & AngioSuite |
| 75  | Linzey et al. <sup>58)</sup> (2017)       | J Neurointerv Surg    | AngioCalc & AngioSuite |
| 76  | Popiela et al. <sup>78)</sup> (2017)      | Neurol Neurochir Pol  | AngioCalc & AngioSuite |
| 77  | Tosello et al. <sup>107)</sup> (2017)     | AJNR Am J Neuroradiol | AngioCalc & AngioSuite |
| 78  | Ban et al. <sup>4)</sup> (2018)           | Neuroradiology        | AngioCalc & AngioSuite |
| 79  | Bender et al. <sup>5)</sup> (2018)        | J Neurointerv Surg    | AngioCalc & AngioSuite |
| 80  | Ilyas et al. <sup>34)</sup> (2018)        | Clin Neurol Neurosurg | AngioCalc & AngioSuite |
| 81  | Park et al. <sup>75)</sup> (2019)         | Acta Neurochir (Wien) | AngioCalc & AngioSuite |
| 82  | Zhang et al. <sup>118)</sup> (2019)       | World Neurosurg       | AngioCalc & AngioSuite |

## Supplementary Data 1. Continued

| No. | Study                                    | Journal                              | Method              |
|-----|------------------------------------------|--------------------------------------|---------------------|
| 83  | Kiyosue et al. <sup>46)</sup> (2002)     | Neurosurgery                         | Workstation         |
| 84  | Bescós et al. <sup>8)</sup> (2005)       | AJNR Am J Neuroradiol                | Workstation         |
| 85  | Slob et al. <sup>92)</sup> (2005)        | Neuroradiology                       | Workstation         |
| 86  | Slob et al. <sup>93)</sup> (2005)        | AJNR Am J Neuroradiol                | Workstation         |
| 87  | Fanning et al. <sup>23)</sup> (2007)     | Neuroradiology                       | Workstation         |
| 88  | Lee et al. <sup>53)</sup> (2009)         | Interv Neuroradiol                   | Workstation         |
| 89  | Ansari et al. <sup>2)</sup> (2011)       | J Neurointerv Surg                   | Workstation         |
| 90  | Clarençon et al. <sup>13)</sup> (2012)   | Neuroradiology                       | Workstation         |
| 91  | Knap et al. <sup>47)</sup> (2013)        | Neurol Neurochir Pol                 | Workstation         |
| 92  | el-Chalouhi et al. <sup>22)</sup> (2014) | World Neurosurg                      | Workstation         |
| 93  | Leng et al. <sup>57)</sup> (2014)        | J Neurointerv Surg                   | Workstation         |
| 94  | Larrabide et al. <sup>51)</sup> (2015)   | J Neurointerv Surg                   | Workstation         |
| 95  | Park et al. <sup>74)</sup> (2015)        | J Neuroimaging                       | Workstation         |
| 96  | Sadato et al. <sup>84)</sup> (2015)      | Interv Neuroradiol                   | Workstation         |
| 97  | Ito et al. <sup>37)</sup> (2016)         | Neurol Med Chir (Tokyo)              | Workstation         |
| 98  | Misaki et al. <sup>66)</sup> (2016)      | World Neurosurg                      | Workstation         |
| 99  | Sadato et al. <sup>83)</sup> (2016)      | Neurosurg Rev                        | Workstation         |
| 100 | Sadato et al. <sup>85)</sup> (2016)      | PLoS One                             | Workstation         |
| 101 | Sluzewski et al. <sup>94)</sup> (2004)   | Radiology                            | Commercial software |
| 102 | Babiker et al. <sup>3)</sup> (2013)      | J Biomech                            | Commercial software |
| 103 | Kuriyama et al. <sup>49)</sup> (2013)    | Nihon Hoshasen Gijutsu Gakkai Zasshi | Commercial software |
| 104 | Takao et al. <sup>103)</sup> (2014)      | AJNR Am J Neuroradiol                | Commercial software |
| 105 | Damiano et al. <sup>20)</sup> (2015)     | J Biomech                            | Commercial software |
| 106 | Nair et al. <sup>68)</sup> (2016)        | J Biomech Eng                        | Commercial software |
| 107 | Sugiyama et al. <sup>101)</sup> (2016)   | Stroke                               | Commercial software |
| 108 | Fujimura et al. <sup>24)</sup> (2017)    | Annu Int Conf IEEE Eng Med Biol Soc  | Commercial software |
| 109 | Misaki et al. <sup>65)</sup> (2017)      | Technol Health Care                  | Commercial software |
| 110 | Otani et al. <sup>73)</sup> (2017)       | Med Biol Eng Comput                  | Commercial software |
| 111 | Umeda et al. <sup>109)</sup> (2017)      | PLoS One                             | Commercial software |
| 112 | Piotin et al. <sup>76)</sup> (2000)      | AJNR Am J Neuroradiol                | Phantom             |
| 113 | Piotin et al. <sup>77)</sup> (2001)      | AJR Am J Roentgenol                  | Phantom             |
| 114 | Bendok et al. <sup>6)</sup> (2007)       | Neurosurgery                         | Phantom             |
| 115 | Chueh et al. <sup>11)</sup> (2015)       | J Neurointerv Surg                   | Phantom             |
| 116 | Sadasivan et al. <sup>82)</sup> (2018)   | J Neurointerv Surg                   | Phantom             |
| 117 | Kono et al. <sup>48)</sup> (2014)        | Neurol Med Chir (Tokyo)              | Not mentioned       |
| 118 | Mascitelli et al. <sup>59)</sup> (2015)  | J Neurointerv Surg                   | Not mentioned       |
| 119 | Starke et al. <sup>100)</sup> (2015)     | J Neurointerv Surg                   | Not mentioned       |
| 120 | Stapleton et al. <sup>99)</sup> (2016)   | Interv Neuroradiol                   | Not mentioned       |

Journals from PubMed search were classified by published year and aneurysm volume quantification methods. Although we live in 3-dimensional angiography era, still ellipsoid method is the most used aneurysm volume quantification method

Supplementary References

1. Abi-Aad KR, Aoun RJN, Rahme RJ, Ward JD, Kniss J, Kwasny MJ, et al. : New generation hydrogel endovascular aneurysm treatment trial (HEAT): a study protocol for a multicenter randomized controlled trial. **Neuroradiology** 60 : 1075-1084, 2018
2. Ansari SA, Dueueke EJ, Kanaan Y, Chaudhary N, Gandhi D, Thompson BG, et al. : Embolization of intracranial aneurysms with second-generation Matrix-2 detachable coils: mid-term and long-term results. **J Neurointerv Surg** 3 : 324-330, 2011
3. Babiker MH, Chong B, Gonzalez LF, Cheema S, Frakes DH : Finite element modeling of embolic coil deployment: multifactor characterization of treatment effects on cerebral aneurysm hemodynamics. **J Biomech** 46 : 2809-2816, 2013
4. Ban SP, Hwang G, Kim CH, Byoun HS, Lee SU, Kim T, et al. : Risk factor analysis of recanalization and retreatment for patients with endovascular treatment of internal carotid artery bifurcation aneurysms. **Neuroradiology** 60 : 535-544, 2018
5. Bender MT, Jiang B, Campos JK, Lin LM, Beaty N, Vo CD, et al. : Single-stage flow diversion with adjunctive coiling for cerebral aneurysm: outcomes and technical considerations in 72 cases. **J Neurointerv Surg** 10 : 843-850, 2018
6. Bendok BR, Parkinson RJ, Hage ZA, Adel JG, Gounis MJ : The effect of vascular reconstruction device-assisted coiling on packing density, effective neck coverage, and angiographic outcome: an in vitro study. **Neurosurgery** 61 : 835-840; discussion 840-841, 2007
7. Berge J, Gariel F, Marnat G, Dousset V : PC400 volumetric coils minimize radiation, reduce procedure time and optimize packing density during endovascular treatment in medium sized cerebral aneurysms. **J Neuro-radiol** 43 : 37-42, 2016
8. Bescós JO, Slob MJ, Slump CH, Sluzewski M, van Rooij WJ : Volume measurement of intracranial aneurysms from 3D rotational angiography: improvement of accuracy by gradient edge detection. **AJNR Am J Neuroradiol** 26 : 2569-2572, 2005
9. Chalouhi N, Jabbour P, Tjoumakaris S, Dumont AS, Chitale R, Rosenwasser RH, et al. : Single-center experience with balloon-assisted coil embolization of intracranial aneurysms: safety, efficacy and indications. **Clin Neurol Neurosurg** 115 : 607-613, 2013
10. Cho YD, Jeon JP, Rhim JK, Park JJ, Yoo RE, Kang HS, et al. : Progressive thrombosis of small saccular aneurysms filled with contrast immediately after coil embolization: analysis of related factors and long-term follow-up. **Neuroradiology** 57 : 615-623, 2015
11. Chueh JY, Vedantham S, Wakhloo AK, Carniato SL, Puri AS, Bzura C, et al. : Aneurysm permeability following coil embolization: packing density and coil distribution. **J Neurointerv Surg** 7 : 676-681, 2015
12. Chun YI, Roh HG, Choe WJ, Cho J, Moon CT, Koh YC : Tiny aneurysms treated with single coil: morphological comparison between bare platinum coil and matrix coil. **Clin Neurol Neurosurg** 115 : 529-534, 2013
13. Clarençon F, Piotin M, Pistocchi S, Babic D, Blanc R : Evaluation of stent visibility by flat panel detector CT in patients treated for intracranial aneurysms. **Neuroradiology** 54 : 1121-1125, 2012
14. Cloft HJ, Kallmes DF : Aneurysm packing with HydroCoil embolic system versus platinum coils: initial clinical experience. **AJNR Am J Neuroradiol** 25 : 60-62, 2004
15. Cloutier F, Khoury N, Ghostine J, Farzin B, Kotowski M, Weill A, et al. : Embolization with larger-caliber coils can increase packing density: evidence from the pilot phase of a randomized trial. **Interv Neuroradiol** 23 : 14-17, 2017
16. Colby GP, Paul AR, Radvany MG, Gandhi D, Gailloud P, Huang J, et al. : A single center comparison of coiling versus stent assisted coiling in 90 consecutive paraophthalmic region aneurysms. **J Neurointerv Surg** 4 : 116-120, 2012
17. Dabus G, Hacein-Bey L, Varjavand B, Tomalty RD, Han PP, Yerokhin V, et al. : Safety, immediate and mid-term results of the newer generation of hydrogel coils in the treatment of ruptured aneurysms: a multicenter study. **J Neurointerv Surg** 9 : 419-424, 2017
18. D'Agostino SJ, Harrigan MR, Chalela JA, Nicholas JS, Deveikis SI, Jones TM, et al. : Clinical experience with Matrix2 360 degrees coils in the treatment of 100 intracranial aneurysms. **Surg Neurol** 72 : 41-47, 2009
19. Dai D, Yong-Hong D, Rezek I, Lewis DA, Kallmes DF, Kadirvel R : Healing of saccular aneurysms following platinum coil embolization: lack of improved efficacy with vitamin C supplementation. **J Neurointerv Surg** 5 : 591-596, 2013
20. Damiano RJ, Ma D, Xiang J, Siddiqui AH, Snyder KV, Meng H : Finite element modeling of endovascular coiling and flow diversion enables hemodynamic prediction of complex treatment strategies for intracranial aneurysm. **J Biomech** 48 : 3332-3340, 2015
21. Ding YH, Dai D, Kadirvel R, Lewis DA, Cloft HJ, Kallmes DF : Relationship between aneurysm volume and histologic healing after coil embolization in elastase-induced aneurysms: a retrospective study. **AJNR Am J Neuroradiol** 29 : 98-101, 2008
22. el-Chalouhi N, Jabbour PM, Tjoumakaris SI, Starke RM, Dumont AS, Liu H, et al. : Treatment of large and giant intracranial aneurysms: cost comparison of flow diversion and traditional embolization strategies. **World Neurosurg** 82 : 696-701, 2014
23. Fanning NF, Berentei Z, Brennan PR, Thornton J : HydroCoil as an adjunct to bare platinum coil treatment of 100 cerebral aneurysms. **Neuroradiology** 49 : 139-148, 2007
24. Fujimura S, Takao H, Suzuki T, Dahmani C, Mamori H, Fukushima N, et al. : Effect of catheter positions on hemodynamics and coil formation after coil embolization. **Annu Int Conf IEEE Eng Med Biol Soc** 2017 : 3397-3400, 2017
25. Gaba RC, Ansari SA, Roy SS, Marden FA, Viana MA, Malisch TW : Embolization of intracranial aneurysms with hydrogel-coated coils versus inert platinum coils: effects on packing density, coil length and quantity, procedure performance, cost, length of hospital stay, and durability of therapy. **Stroke** 37 : 1443-1450, 2006
26. Ghostine J, Khoury N, Cloutier F, Kotowski M, Gentric JC, Batista AL, et al. : Endovascular treatment of aneurysms and platinum coil caliber: study protocol of a randomized, controlled trial. **Interv Neuroradiol** 22 : 693-699, 2016

27. Goddard JK, Moran CJ, Cross DT 3rd, Derdeyn CP : Absent relationship between the coil-embolization ratio in small aneurysms treated with a single detachable coil and outcomes. **AJNR Am J Neuroradiol** **26** : 1916-1920, 2005
28. Griessenauer CJ, Adeeb N, Foreman PM, Gupta R, Patel AS, Moore J, et al. : Impact of coil packing density and coiling technique on occlusion rates for aneurysms treated with stent-assisted coil embolization. **World Neurosurg** **94** : 157-166, 2016
29. Gross BA, Ares WJ, Ducruet AF, Jadhav AP, Jovin TG, Jankowitz BT : A clinical comparison of Atlas and LVIS Jr stent-assisted aneurysm coiling. **J Neurointerv Surg** **11** : 171-174, 2019
30. Guo XB, Fan YM, Zhang JN : HydroSoft coil versus HydroCoil for endovascular aneurysm occlusion study: a single center experience. **Eur J Radiol** **79** : e42-e46, 2011
31. Harada K, Morioka J : Initial experience with an extremely soft bare platinum coil, ED coil-10 extra soft, for endovascular treatment of cerebral aneurysms. **J Neurointerv Surg** **5** : 577-581, 2013
32. Haworth KJ, Weidner CR, Abruzzo TA, Shearn JT, Holland CK : Mechanical properties and fibrin characteristics of endovascular coil-clot complexes: relevance to endovascular cerebral aneurysm repair paradigms. **J Neurointerv Surg** **7** : 291-296, 2015
33. Hirsch JA, Bendok BR, Paulsen RD, Cognard C, Campos J, Cronqvist M : Midterm clinical experience with a complex-shaped detachable platinum coil system for the treatment of cerebral aneurysms: TruFill DCS Orbit detachable coil system registry interim results. **J Vasc Interv Radiol** **18** : 1487-1494, 2007
34. Ilyas A, Buell TJ, Chen CJ, Ding D, Raper DMS, Taylor DG, et al. : SMART coils for intracranial aneurysm embolization: initial outcomes. **Clin Neurol Neurosurg** **164** : 87-91, 2018
35. Imamura H, Sakai N, Ito Y, Sakai C, Hyodo A, Miyachi S, et al. : Prospective registry of embolization of intracranial aneurysms using hydrosoft coils: results of the Japanese HydroSoft Registry. **World Neurosurg** **127** : e631-e637, 2019
36. Ishida W, Sato M, Amano T, Matsumaru Y : The significant impact of framing coils on long-term outcomes in endovascular coiling for intracranial aneurysms: how to select an appropriate framing coil. **J Neurosurg** **125** : 705-712, 2016
37. Ito H, Onodera H, Wakui D, Uchida M, Sase T, Morishima H, et al. : Impact of aneurysmal neck position in endovascular therapy for anterior communicating artery aneurysms. **Neurol Med Chir (Tokyo)** **56** : 21-26, 2016
38. Izar B, Rai A, Raghuram K, Rotruck J, Carpenter J : Comparison of devices used for stent-assisted coiling of intracranial aneurysms. **PLoS One** **6** : e24875, 2011
39. Jiang C, Yu Y, Hong B, Fu QL, Liu JM, Huang QH : Stent-assisted coil embolization for the treatment of ruptured aneurysms at the anterior circulation: comparison between HydroSoft coils and bare platinum coils. **Cardiovasc Intervent Radiol** **37** : 935-941, 2014
40. Kaesmacher J, Müller-Leisse C, Huber T, Boeckh-Behrens T, Haller B, Shibani E, et al. : Volume versus standard coils in the treatment of intracranial aneurysms. **J Neurointerv Surg** **8** : 1034-1040, 2016
41. Kai Y, Hamada J, Morioka M, Yano S, Kuratsu J : Evaluation of the stability of small ruptured aneurysms with a small neck after embolization with Guglielmi detachable coils: correlation between coil packing ratio and coil compaction. **Neurosurgery** **56** : 785-792; discussion 785-792, 2005
42. Kawanabe Y, Sadato A, Taki W, Hashimoto N : Endovascular occlusion of intracranial aneurysms with Guglielmi detachable coils: correlation between coil packing density and coil compaction. **Acta Neurochir (Wien)** **143** : 451-455, 2001
43. Khatri R, Chaudhry SA, Rodriguez GJ, Suri MF, Cordina SM, Qureshi AI : Frequency and factors associated with unsuccessful lead (first) coil placement in patients undergoing coil embolization of intracranial aneurysms. **Neurosurgery** **72** : 452-458; discussion 458, 2013
44. Kim BM, Kim DJ, Jeon P, Yoon PH, Lee BH, Lee MS, et al. : Endovascular embolization of intracranial aneurysms using bare platinum Axiom™ detachable coils: immediate and short-term follow-up results from a multicenter registry. **Neurointervention** **7** : 85-92, 2012
45. Kim ST, Baek JW, Lee WH, Lee KS, Kwon WH, Pyo S, et al. : Causes of early rebleeding after coil embolization of ruptured cerebral aneurysms. **Clin Neurol Neurosurg** **174** : 108-116, 2018
46. Kiyosue H, Okahara M, Tanoue S, Nakamura T, Nagatomi H, Mori H : Detection of the residual lumen of intracranial aneurysms immediately after coil embolization by three-dimensional digital subtraction angiographic virtual endoscopic imaging. **Neurosurgery** **50** : 476-484; discussion 484-485, 2002
47. Knap D, Gruszczynska K, Partyka R, Ptak D, Korzekwa M, Zbrozczyk M, et al. : Results of endovascular treatment of aneurysms depending on their size, volume and coil packing density. **Neurol Neurochir Pol** **47** : 467-475, 2013
48. Kono K, Shintani A, Okada H, Tanaka Y, Terada T : Stent-assisted coil embolization for cavernous carotid artery aneurysms. **Neurol Med Chir (Tokyo)** **54** : 126-132, 2014
49. Kuriyama T, Sakai N, Furukawa H, Oonishi K, Okumachi H, Imamura H, et al. : Examination of factors useful for choosing a method to assist coil embolization of unruptured cerebral aneurysm. **Nihon Hoshasen Gijutsu Gakkai Zasshi** **69** : 1232-1240, 2013
50. Lang S, Rösch J, Göllitz P, Kloska S, Struffert T, Doerfler A : Comparison of intracranial aneurysms treated by 2-D versus 3-D coils: a matched-pairs analysis. **Clin Neuroradiol** **27** : 43-49, 2017
51. Larrabide I, Geers AJ, Morales HG, Aguilar ML, Rüfenacht DA : Effect of aneurysm and ICA morphology on hemodynamics before and after flow diverter treatment. **J Neurointerv Surg** **7** : 272-280, 2015
52. Lawson MF, Newman WC, Chi YY, Mocco JD, Hoh BL : Stent-associated flow remodeling causes further occlusion of incompletely coiled aneurysms. **Neurosurgery** **69** : 598-603; discussion 603-604, 2011
53. Lee DH, Arat A, Morsi H, Jou LD, Mawad ME : Embolization of cerebral aneurysms with spherically shaped detachable microcoils (micrusphere microcoil system). A single centre experience. **Interv Neuroradiol** **15** : 29-36, 2009
54. Lee J, Cho YD, Yoo DH, Kang HS, Cho WS, Kim JE, et al. : Does stent type impact coil embolization outcomes in extended follow-up of small-

- sized aneurysms (< 10 mm)? **Neuroradiology** **60** : 747-756, 2018
55. Lee JY, Kwon BJ, Cho YD, Kang HS, Han MH : Reappraisal of anatomic outcome scales of coiled intracranial aneurysms in the prediction of recanalization. **J Korean Neurosurg Soc** **53** : 342-348, 2013
  56. Lee JY, Seo JH, Lee SJ, Son YJ, Cho YD, Kang HS, et al. : Mid-term outcome of intracranial aneurysms treated with HydroSoft coils compared to historical controls treated with bare platinum coils: a single-center experience. **Acta Neurochir (Wien)** **156** : 1687-1694, 2014
  57. Leng B, Zheng Y, Ren J, Xu Q, Tian Y, Xu F : Endovascular treatment of intracranial aneurysms with detachable coils: correlation between aneurysm volume, packing, and angiographic recurrence. **J Neurointerv Surg** **6** : 595-599, 2014
  58. Linzey JR, Griauzde J, Guan Z, Bentley N, Gemmete JJ, Chaudhary N, et al. : Stent-assisted coiling of cerebrovascular aneurysms: experience at a large tertiary care center with a focus on predictors of recurrence. **J Neurointerv Surg** **9** : 1081-1085, 2017
  59. Mascitelli JR, Moyle H, Oermann EK, Polykarpou MF, Patel AA, Doshi AH, et al. : An update to the Raymond-Roy occlusion classification of intracranial aneurysms treated with coil embolization. **J Neurointerv Surg** **7** : 496-502, 2015
  60. Mascitelli JR, Oermann EK, De Leacy RA, Moyle H, Mocco J, Patel AB : Predictors of treatment failure following coil embolization of intracranial aneurysms. **J Clin Neurosci** **22** : 1275-1281, 2015
  61. Mascitelli JR, Patel AB, Polykarpou MF, Patel AA, Moyle H : Analysis of early angiographic outcome using unique large diameter coils in comparison with standard coils in the embolization of cerebral aneurysms: a retrospective review. **J Neurointerv Surg** **7** : 126-130, 2015
  62. Mascitelli JR, Polykarpou MF, Patel AA, Kamath AA, Moyle H, Patel AB : Initial experience with Penumbra coil 400 versus standard coils in embolization of cerebral aneurysms: a retrospective review. **J Neurointerv Surg** **5** : 573-576, 2013
  63. Matsushige T, Sakamoto S, Ishii D, Shinagawa K, Shimonaga K, Hosogai M, et al. : Safety and efficacy of a new outreach distal access catheter, TACTICS, for coil embolization of unruptured intracranial aneurysms. **Interv Neuroradiol** **24** : 482-488, 2018
  64. Milburn J, Pansara AL, Vidal G, Martinez RC : Initial experience using the Penumbra coil 400: comparison of aneurysm packing, cost effectiveness, and coil efficiency. **J Neurointerv Surg** **6** : 121-124, 2014
  65. Misaki K, Takao H, Suzuki T, Nishimura K, Kan I, Yuki I, et al. : Estimated pretreatment hemodynamic prognostic factors of aneurysm recurrence after endovascular embolization. **Technol Health Care** **25** : 843-850, 2017
  66. Misaki K, Uchiyama N, Nambu I, Aida Y, Kamide T, Mohri M, et al. : Optimizing the volume of the initial framing coil to facilitate tight packing of intracranial aneurysms. **World Neurosurg** **90** : 397-402, 2016
  67. Murayama Y, Viñuela F, Ishii A, Nien YL, Yuki I, Duckwiler G, et al. : Initial clinical experience with matrix detachable coils for the treatment of intracranial aneurysms. **J Neurosurg** **105** : 192-199, 2006
  68. Nair P, Chong BW, Indahlstari A, Ryan J, Workman C, Haithem Babiker M, et al. : Hemodynamic characterization of geometric cerebral aneurysm templates treated with embolic coils. **J Biomech Eng** **138** : 021011, 2016
  69. Nakazaki M, Nonaka T, Nomura T, Onda T, Yonemasu Y, Takahashi A, et al. : Cerebral aneurysm neck diameter is an independent predictor of progressive occlusion after stent-assisted coiling. **Acta Neurochir (Wien)** **159** : 1313-1319, 2017
  70. Neki H, Kohyama S, Otsuka T, Yonezawa A, Ishihara S, Yamane F : Optimal first coil selection to avoid aneurysmal recanalization in endovascular intracranial aneurysmal coiling. **J Neurointerv Surg** **10** : 50-54, 2018
  71. Ohshima T, Goto S, Yamamoto T, Ishikawa K : Hemispheric divided coiling technique for coil embolization of middle- and large-sized intracranial aneurysms. **Nagoya J Med Sci** **79** : 505-513, 2017
  72. Osanai T, Bain M, Hui FK : Versatile fill coils: initial experience as framing coils for oblong aneurysms. A technical case report. **Interv Neuroradiol** **20** : 287-294, 2014
  73. Otani T, Ii S, Shigematsu T, Fujinaka T, Hirata M, Ozaki T, et al. : Computational study for the effects of coil configuration on blood flow characteristics in coil-embolized cerebral aneurysm. **Med Biol Eng Comput** **55** : 697-710, 2017
  74. Park KY, Kim BM, Ihm EH, Baek JH, Kim DJ, Kim DI, et al. : Relationship between two types of coil packing densities relative to aneurysm size. **J Neuroimaging** **25** : 415-419, 2015
  75. Park YK, Bae HJ, Cho DY, Choi JH, Kim BS, Shin YS : Risk factors for recurrence and retreatment after endovascular treatment of intracranial saccular aneurysm larger than 8 mm. **Acta Neurochir (Wien)** **161** : 939-946, 2019
  76. Pötin M, Mandai S, Murphy KJ, Sugiu K, Gailloud P, Martin JB, et al. : Dense packing of cerebral aneurysms: an in vitro study with detachable platinum coils. **AJNR Am J Neuroradiol** **21** : 757-760, 2000
  77. Pötin M, Mandai S, Sugiu K, Gailloud P, Rufenacht DA : Endovascular treatment of cerebral aneurysms: an in vitro study with detachable platinum coils and tricellulose acetate polymer. **AJR Am J Roentgenol** **176** : 235-239, 2001
  78. Popiela TJ, Brzegowy P, Łasocha B, Urbanik A : The effectiveness of Penumbra 400 micro-coils in the embolization of large cerebral aneurysms. **Neurol Neurochir Pol** **51** : 304-310, 2017
  79. Ren H, Wei M, Yin L, Ma L, Peng L : Endovascular coiling of small intracranial aneurysms using a very soft bare platinum coil: a comparison of the packing performance of new and old HyperSoft® helical coils. **Interv Neuroradiol** **22** : 26-33, 2016
  80. Reul J, Spetzger U, Weis J, Sure U, Gilsbach JM, Thron A : Endovascular occlusion of experimental aneurysms with detachable coils: influence of packing density and perioperative anticoagulation. **Neurosurgery** **41** : 1160-1165; discussion 1165-1168, 1997
  81. Ross IB, Dhillon GS : Balloon assistance as a routine adjunct to the endovascular treatment of cerebral aneurysms. **Surg Neurol** **66** : 593-601; discussion 601-602, 2006
  82. Sadasivan C, Swartwout E, Kappel AD, Woo HH, Fiorella DJ, Lieber BB : In vitro measurement of the permeability of endovascular coils deployed in cerebral aneurysms. **J Neurointerv Surg** **10** : 896-900, 2018
  83. Sadato A, Adachi K, Hayakawa M, Kato Y, Hirose Y : Effects of anatomic



- characteristics of aneurysms on packing density in endovascular coil embolization: analysis of a single center's experience. **Neurosurg Rev** **39** : 109-114; discussion 114, 2016
84. Sadato A, Hayakawa M, Adachi K, Kato Y, Hirose Y : Use of a new soft and long coil reduces the number of coils to embolize a small aneurysm. **Interv Neuroradiol** **21** : 161-166, 2015
  85. Sadato A, Hayakawa M, Adachi K, Nakahara I, Hirose Y : Large residual volume, not low packing density, is the most influential risk factor for recanalization after coil embolization of cerebral aneurysms. **PLoS One** **11** : e0155062, 2016
  86. Satoh K, Matsubara S, Hondoh H, Nagahiro S : Intracranial aneurysm embolization using interlocking detachable coils. Correlation between volume embolization rate and coil compaction. **Interv Neuroradiol** **3 Suppl 2** : 125-128, 1997
  87. Satoh K, Satomi J, Matsubara S, Nagahiro S : Measurement of volume ratio to predict coil compaction, on aneurysmal embolization. **Interv Neuroradiol** **4 Suppl 1** : 179-182, 1998
  88. Sellar R, White P, Horribine L, Keston P : Initial experience with a new soft stretch-resistant coil. **J Neuroradiol** **31** : 409-412, 2004
  89. Serafin Z, Strzeżniewski P, Beuth W : Predictors of residual flow in embolized intracranial ruptured aneurysms at early follow-up. **Pol J Radiol** **79** : 42-46, 2014
  90. Simon SD, Reig AS, James RF, Reddy P, Mericle RA : Relative cost comparison of embolic materials used for treatment of wide-necked intracranial aneurysms. **J Neurointerv Surg** **2** : 163-167, 2010
  91. Singla A, Villwock MR, Jacobsen W, Deshaies EM : Aneurysm embolization grade: a predictive tool for aneurysm recurrence after coil embolization. **Acta Neurochir (Wien)** **155** : 231-236, 2013
  92. Slob MJ, Sluzewski M, van Rooij WJ : The relation between packing and reopening in coiled intracranial aneurysms: a prospective study. **Neuroradiology** **47** : 942-945, 2005
  93. Slob MJ, van Rooij WJ, Sluzewski M : Coil thickness and packing of cerebral aneurysms: a comparative study of two types of coils. **AJNR Am J Neuroradiol** **26** : 901-903, 2005
  94. Sluzewski M, van Rooij WJ, Slob MJ, Bescós JO, Slump CH, Wijnalda D : Relation between aneurysm volume, packing, and compaction in 145 cerebral aneurysms treated with coils. **Radiology** **231** : 653-658, 2004
  95. Smith MJ, Mascitelli J, Santillan A, Brennan JS, Tsiouris AJ, Riina HA, et al. : Bare platinum vs matrix detachable coils for the endovascular treatment of intracranial aneurysms: a multivariate logistic regression analysis and review of the literature. **Neurosurgery** **69** : 557-564; discussion 565, 2011
  96. Sokolowski JD, Ilyas A, Buell TJ, Taylor DG, Chen CJ, Ding D, et al. : SMART coils for intracranial aneurysm embolization: follow-up outcomes. **J Clin Neurosci** **59** : 93-97, 2019
  97. Sousa EB, Brandão LFS, Tavares CB, Brito JNPO, Kessler IM : Importance of the first coil in the embolization of intracranial aneurysms : a case control study. **Clin Neuroradiol** **29** : 733-740, 2019
  98. Speirs JW, Burke TH, Lee SY, Ala BD : The next generation HydroCoil: initial clinical experience with the HydroFill embolic coil. **J Neurointerv Surg** **5 Suppl 3** : iii72-iii75, 2013
  99. Stapleton CJ, Kumar JJ, Walcott BP, Torok CM, Agarwalla PK, Koch MJ, et al. : The effect of basilar artery bifurcation angle on rates of initial occlusion, recanalization, and retreatment of basilar artery apex aneurysms following coil embolization. **Interv Neuroradiol** **22** : 389-395, 2016
  100. Starke RM, Durst CR, Evans A, Ding D, Raper DM, Jensen ME, et al. : Endovascular treatment of unruptured wide-necked intracranial aneurysms: comparison of dual microcatheter technique and stent-assisted coil embolization. **J Neurointerv Surg** **7** : 256-261, 2015
  101. Sugiyama S, Niizuma K, Sato K, Rashad S, Kohama M, Endo H, et al. : Blood flow into basilar tip aneurysms: a predictor for recanalization after coil embolization. **Stroke** **47** : 2541-2547, 2016
  102. Suri MF, Memon MZ, Qureshi AI : Treatment of unruptured intracranial aneurysms using internally expanding coils. **J Vasc Interv Neurol** **1** : 42-45, 2008
  103. Takao H, Ishibashi T, Saguchi T, Arakawa H, Ebara M, Irie K, et al. : Validation and initial application of a semiautomatic aneurysm measurement software: a tool for assessing volumetric packing attenuation. **AJNR Am J Neuroradiol** **35** : 721-726, 2014
  104. Tamatani S, Ito Y, Abe H, Koike T, Takeuchi S, Tanaka R : Evaluation of the stability of aneurysms after embolization using detachable coils: correlation between stability of aneurysms and embolized volume of aneurysms. **AJNR Am J Neuroradiol** **23** : 762-767, 2002
  105. Taschner CA, Chapot R, Costalat V, Machi P, Courthéoux P, Barreau X, et al. : GREAT-a randomized controlled trial comparing HydroSoft/HydroFrame and bare platinum coils for endovascular aneurysm treatment: procedural safety and core-lab-assessed angiographic results. **Neuroradiology** **58** : 777-786, 2016
  106. Tausky P, Kallmes DF, Cloft H : Mathematic analysis of incremental packing density with detachable coils: does that last coil matter much? **AJNR Am J Neuroradiol** **33** : E74-E75, 2012
  107. Tosello RT, Batista UC, Pereira BJA, Piske RL : Packing density necessary to reach a high complete occlusion rate in circumferential unruptured intracranial aneurysms treated with stent-assisted coil embolization. **AJNR Am J Neuroradiol** **38** : 1973-1977, 2017
  108. Tsutsumi M, Aikawa H, Nii K, Hamaguchi S, Etou H, Sakamoto K, et al. : Early ceasing of intra-aneurysmal contrast opacification during coil embolization in ruptured aneurysms compared with unruptured aneurysms. **Neurosurgery** **69** : 651-658; discussion 658, 2011
  109. Umeda Y, Ishida F, Tsuji M, Furukawa K, Shiba M, Yasuda R, et al. : Computational fluid dynamics (CFD) using porous media modeling predicts recurrence after coiling of cerebral aneurysms. **PLoS One** **12** : e0190222, 2017
  110. Vallée JN, Pierot L, Mont'alverne F, Turjman F, Bonafé A, Bracard S, et al. : Unruptured intracranial aneurysms treated by three-dimensional coil embolization: evaluation of the postoperative aneurysm occlusion volume. **Neuroradiology** **47** : 438-445, 2005
  111. Wakhloo AK, Gounis MJ, Sandhu JS, Akkawi N, Schenck AE, Linfante I : Complex-shaped platinum coils for brain aneurysms: higher packing density, improved biomechanical stability, and midterm angiographic outcome. **AJNR Am J Neuroradiol** **28** : 1395-1400, 2007
  112. Wang C, Ching EC, Hui FK : Aneurysm coil embolization: cost per volu-

- metric filling analysis and strategy for cost reduction. **J Neurointerv Surg** 8 : 541-543, 2016
113. Wei M, Ren H, Yin L : The combinational use of dual microcatheter technique and new hypersoft helical coil for endovascular treatment of tiny intracranial aneurysm with difficult geometry. **Interv Neuroradiol** 22 : 18-25, 2016
114. Yagi K, Satoh K, Satomi J, Matsubara S, Nagahiro S : Evaluation of aneurysm stability after endovascular embolization with Guglielmi detachable coils: correlation between long-term stability and volume embolization ratio. **Neurol Med Chir (Tokyo)** 45 : 561-565; discussion 565-566, 2005
115. Yamazaki T, Sonobe M, Nakai Y, Sugita K, Matsumaru Y, Yanaka K, et al. : Predictors of angiographic changes in neck remnants of ruptured cerebral aneurysms treated with Guglielmi detachable coils. **Neurol Med Chir (Tokyo)** 46 : 1-9; discussion 9-10, 2006
116. Yin L, Wei M, Ren H : Double microcatheter technique for coil embolization of small aneurysms with unfavorable configurations: a comparative study of the aneurysms that are  $\leq 3$  mm or  $> 3$  mm. **Interv Neuroradiol** 22 : 158-164, 2016
117. Zhang J, Wang D, Li X : Solitaire AB stent-assisted coiling embolization for the treatment of ruptured very small intracranial aneurysms. **Exp Ther Med** 10 : 2239-2244, 2015
118. Zhang K, Wang ZL, Gao BL, Xue JY, Li TX, Zhao TY, et al. : Use of a first large-sized coil versus conventional coils for embolization of cerebral aneurysms: effects on packing density, coil length, and durable occlusion. **World Neurosurg** 127 : e685-e691, 2019
119. Zhang Y, Xing X, Shen X, Zhu X : The volume embolization ratio of intraaneurysmal embolization using Guglielmi detachable coils. **Turk Neurosurg** 25 : 866-872, 2015
120. Zhao R, Shen J, Huang QH, Nie JH, Xu Y, Hong B, et al. : Endovascular treatment of ruptured tiny, wide-necked posterior communicating artery aneurysms using a modified stent-assisted coiling technique. **J Clin Neurosci** 20 : 1377-1381, 2013
